## Scientific & Organizing Committee

### Cardiostim Team

**Philippe Ritter**, Christine Alonso, Serge Cazeau, Arnaud Lazarus, Gaël Jauvert

**David HAYES (Rochester, USA)**

**Douglas ZIPES (Indianapolis, USA)**

**Nadir SAOUDI (Monaco, MCO)**

### European Heart Rhythm Association (EHRA)

#### Executive Board

**Brugada Terradellas J. – ESP**

**Vardas P. – GRC**

**Priori S. G. – ITA**

**Jais P. – FRA, Kautzner J. – CZE, Schalij M.J. – NLD, Camm A.J. – GBR**

#### In collaboration with

- Société Française de Cardiologie
- European Society of Cardiology (ESC)
- European Heart Rhythm Association (EHRA)
  - Heart Rhythm Society (HRS)
- International Cardiac Pacing and Electrophysiology Society (ICPES)
- International Society for Holter and Noninvasive Electrocardiology (ISHNE)
- Groupe Français d'Electrophysiologie et de Stimulation Cardiaque de la Société Française de Cardiologie
- Club Français des Technologies Biomédicales de la SEE (Société des Electroniciens et des Electriciens)
  - Sociedad Asociación Civil Argentina de Estimulación Cardíaca (SADEC)
  - Japan Heart Rhythm Society (J.H.R.S.)
  - Asian-Pacific Society of Cardiology
  - Brazilian Society of Cardiology
- Latin-American Society of Pacing and Electrophysiology (SOLAECE)
- Artificial Cardiac Electrostimulation Department of the Brazilian Cardiac Surgery Group (DECA)
  - Associazione Italiana di Aritmologia e Cardiostimolazione (A.I.A.C.)
  - Mediterranean Society of Pacing and Electrophysiology (MESPE)
- The RETAC Group (Reunion of European countries for the Treatment of Arrhythmias in Cardiology/Réseau Européen pour le Traitement des Arythmies Cardiaques)

#### Scientific Organization:

CARDIOSTIM 2008

**Dr Philippe Ritter**

12, rue Pasteur, F-92210 Saint-Cloud – France

Tel.: +33 1 41 12 07 10/03 46 – Fax: +33 1 46 02 05 09

Web Site: [ww.cardiostim.fr](http://ww.cardiostim.fr)

Email: [cardiostim@wanadoo.fr](mailto:cardiostim@wanadoo.fr)

#### Technical Organization:

CARDIOSTIM/REED EXPOSITIONS FRANCE

52–54, quai de Dio-Bouton, F-92800 Puteaux— France

Tel.: +33 1 47 56 21 18 – Fax: +33 47 56 24 66

Web Site: [www.cardiostim.fr](http://www.cardiostim.fr) – E-mail: [monique\\_gauthier@reedexpo.fr](mailto:monique_gauthier@reedexpo.fr)
